# Supplementary material for: DNA-Binding and Cytotoxicity of Copper(I) Complexes Containing Functionalized Dipyridylphenazine Ligands
Source: MDPI journal article supplement (doi:10.3390/pharmaceutics13050764), 2021-05-20
Supplement: s1 [file s1]

# Supplementary Materials: DNA-Binding and Cytotoxicity of Copper(I) Complexes Containing Functionalized Dipyrroldiphenazine Ligands

Sammar Alsaedi, Bandar A. Babgi, Magda H. Abdellattif, Muhammed N. Arshad, Abdul-Hamid M. Emwas, Mariusz Jaremko, Mark G. Humphrey, Abdullah M. Asiri and Mostafa A. Hussien

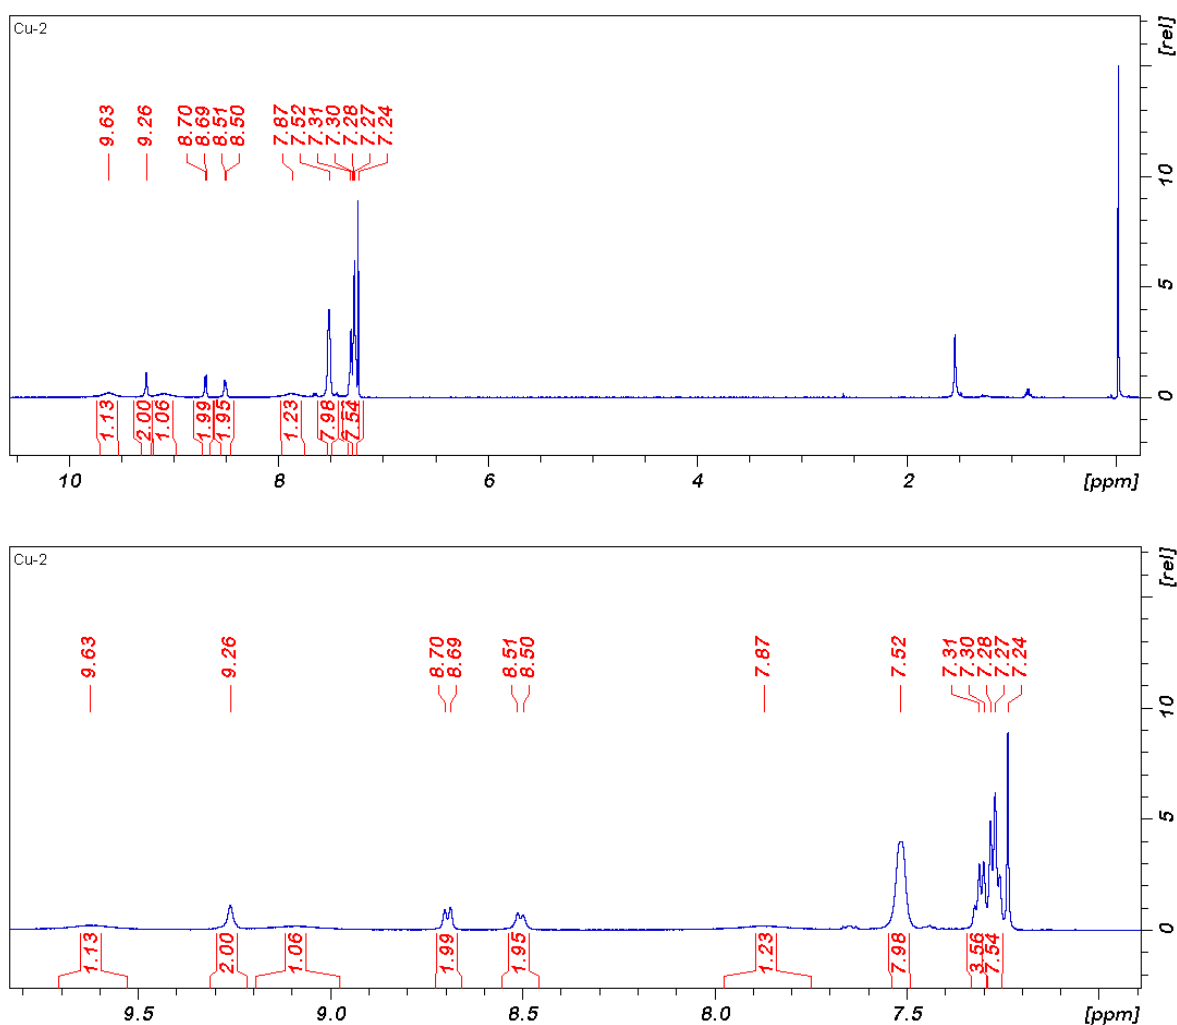

Figure S1.  $^1\text{H}$  NMR of complex Cu-2.

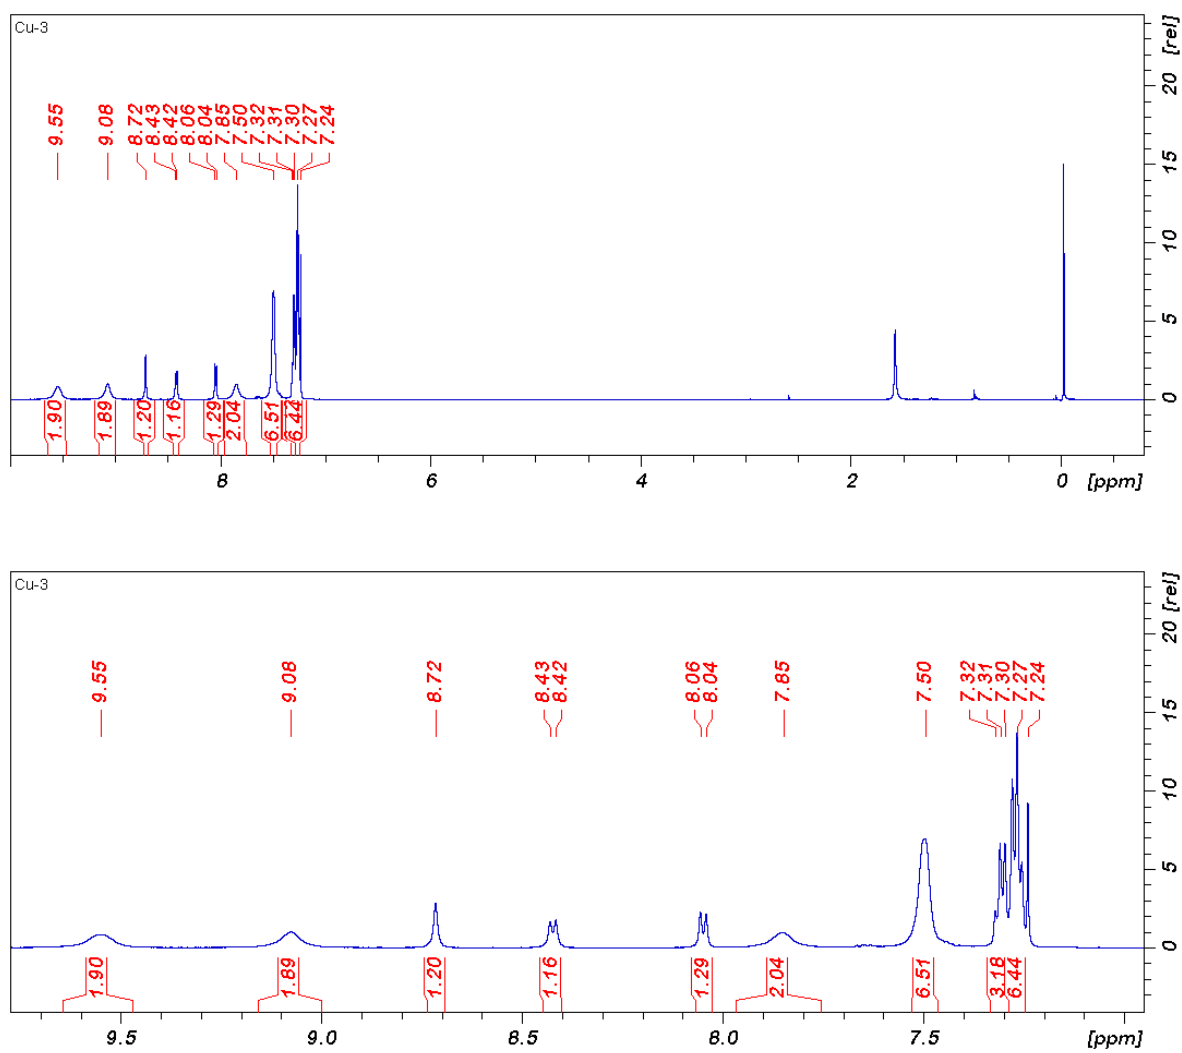Figure S2.  $^1\text{H}$  NMR of complex Cu-3.

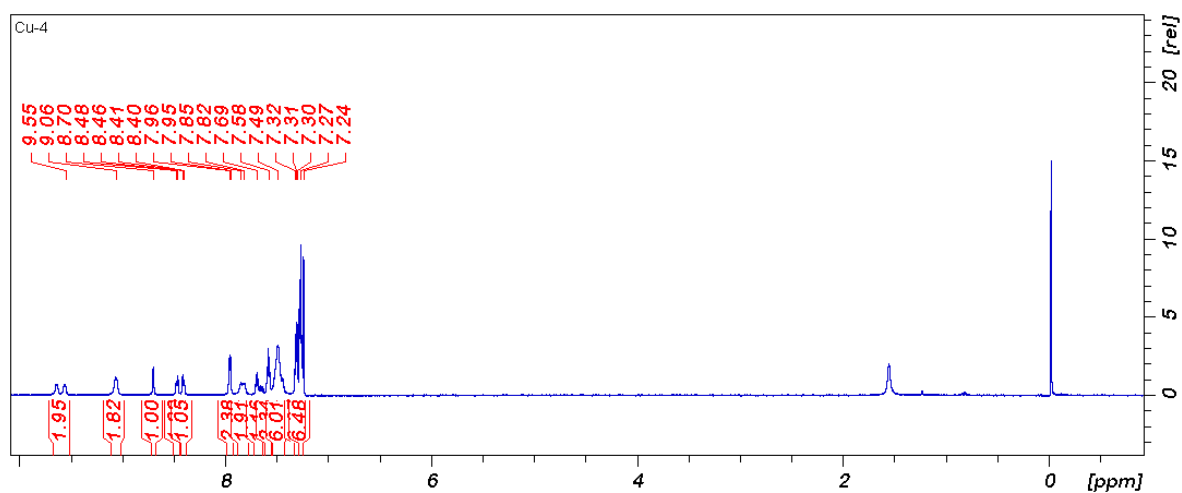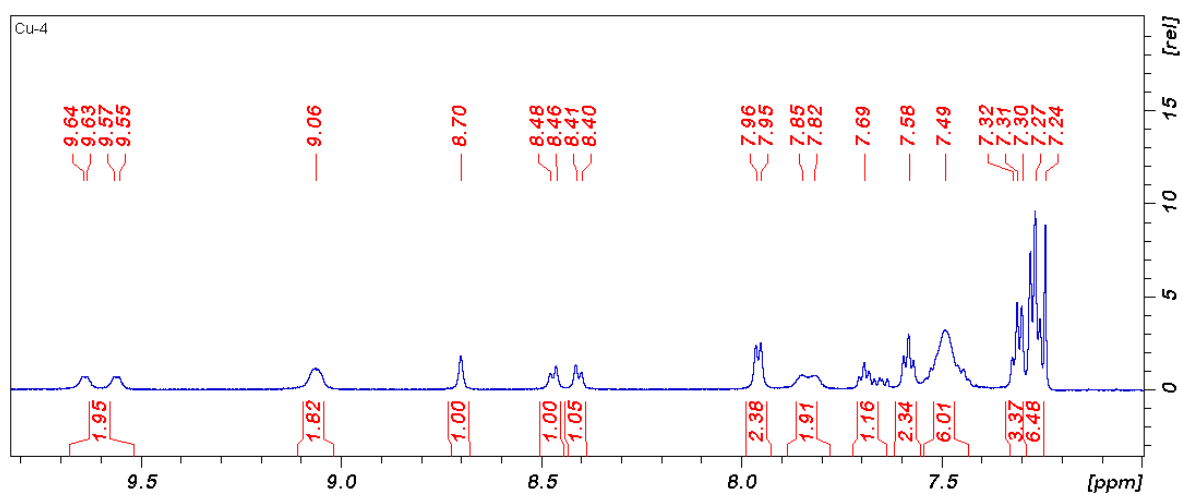Figure S3.  $^1\text{H}$  NMR of complex Cu-4.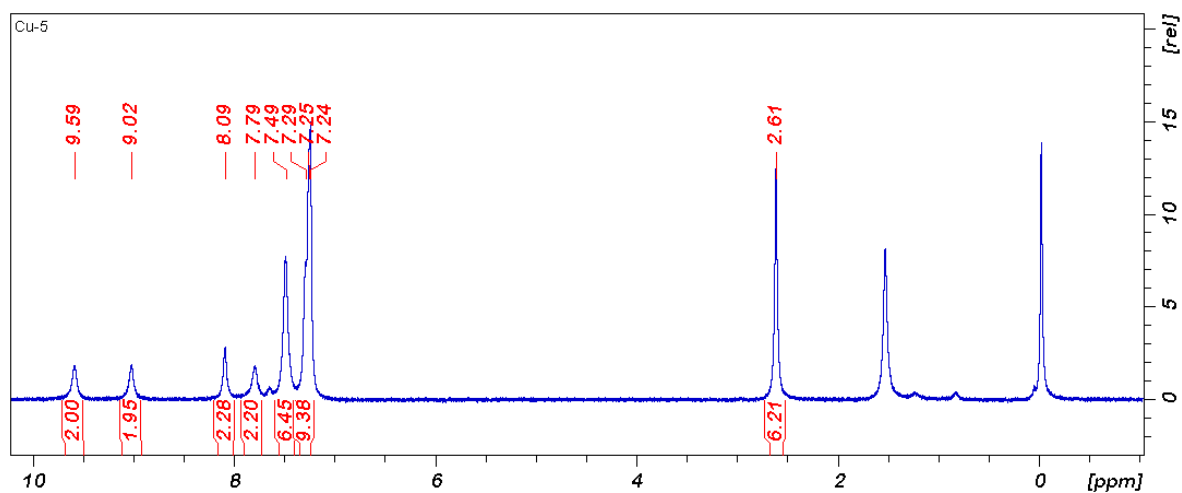Figure S4.  $^1\text{H}$  NMR of complex Cu-5.

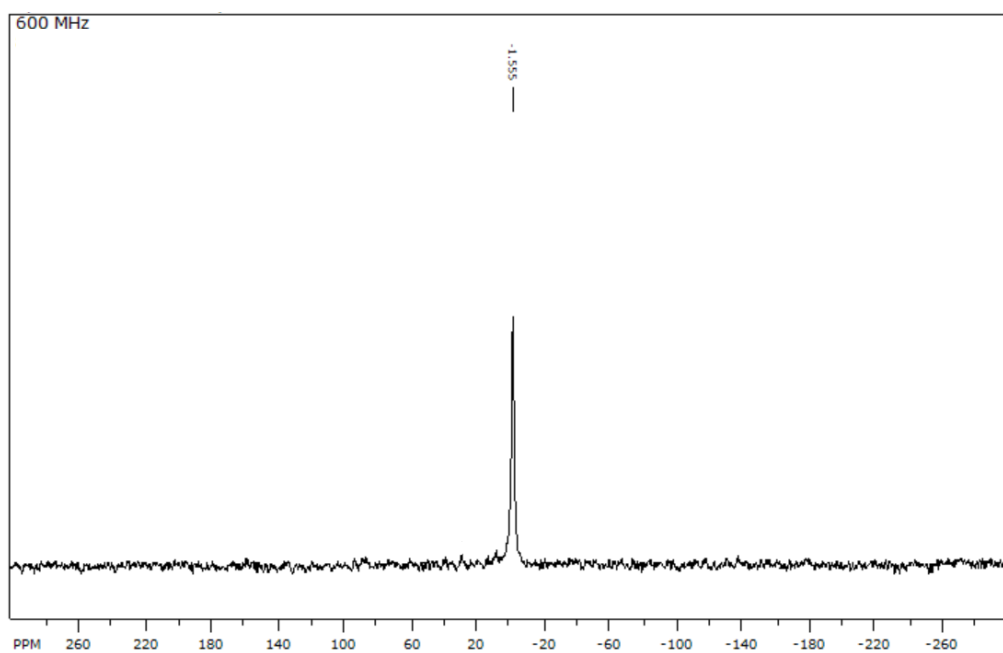

Figure S5.  $^{31}\text{P}$  NMR of complex Cu-2.

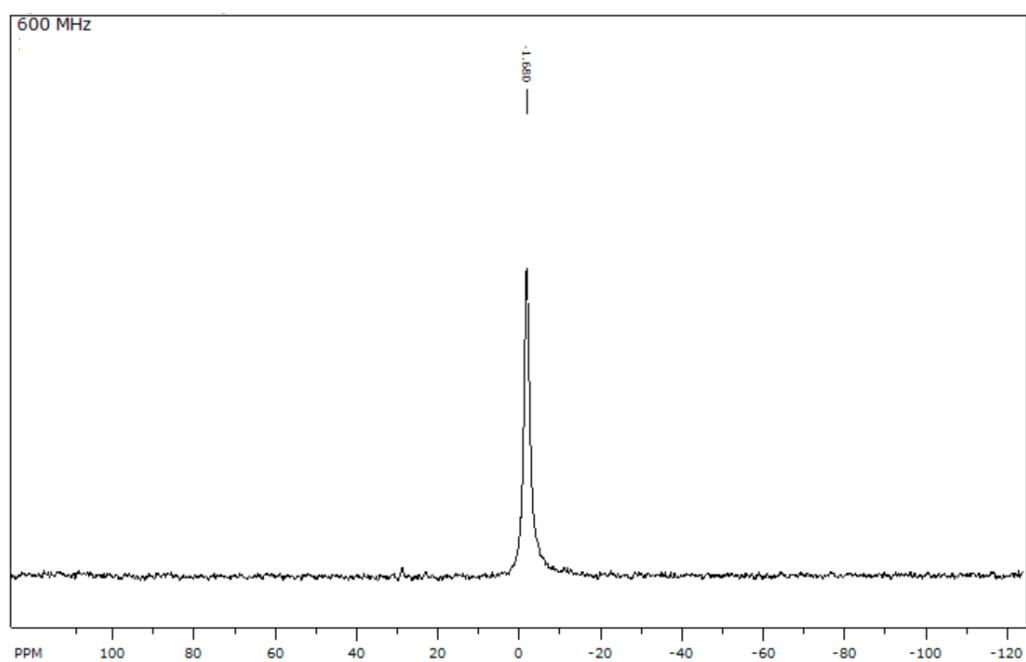

Figure S6.  $^{31}\text{P}$  NMR of complex Cu-3.

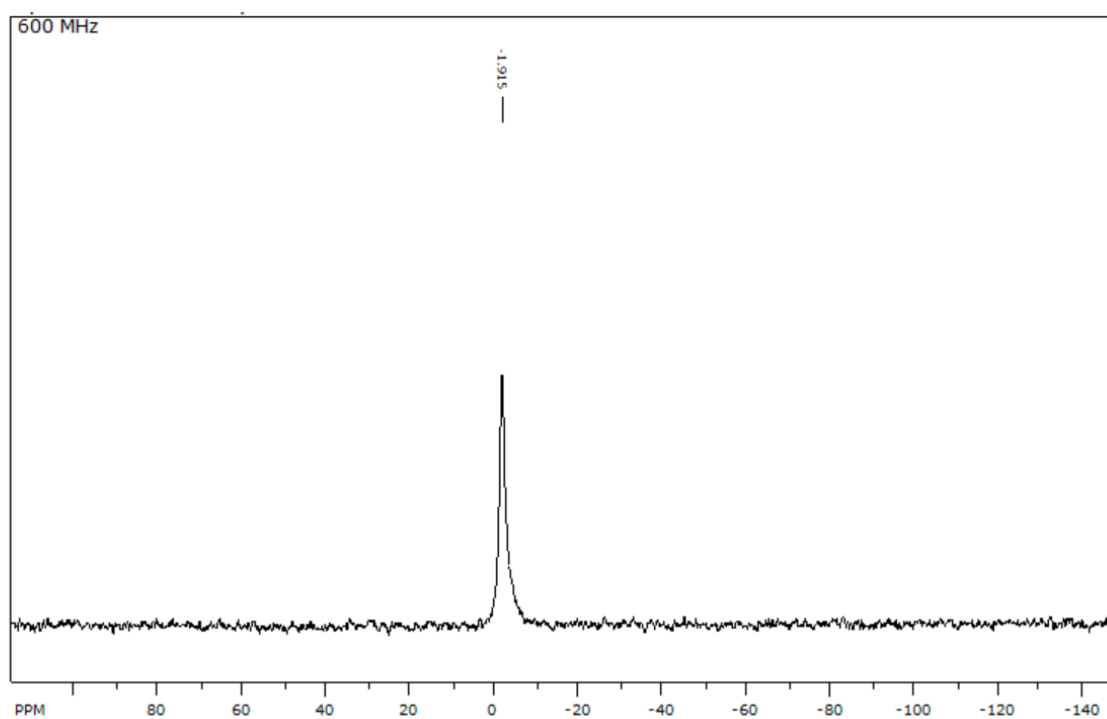

Figure S7.  $^{31}\text{P}$  NMR of complex Cu-4.

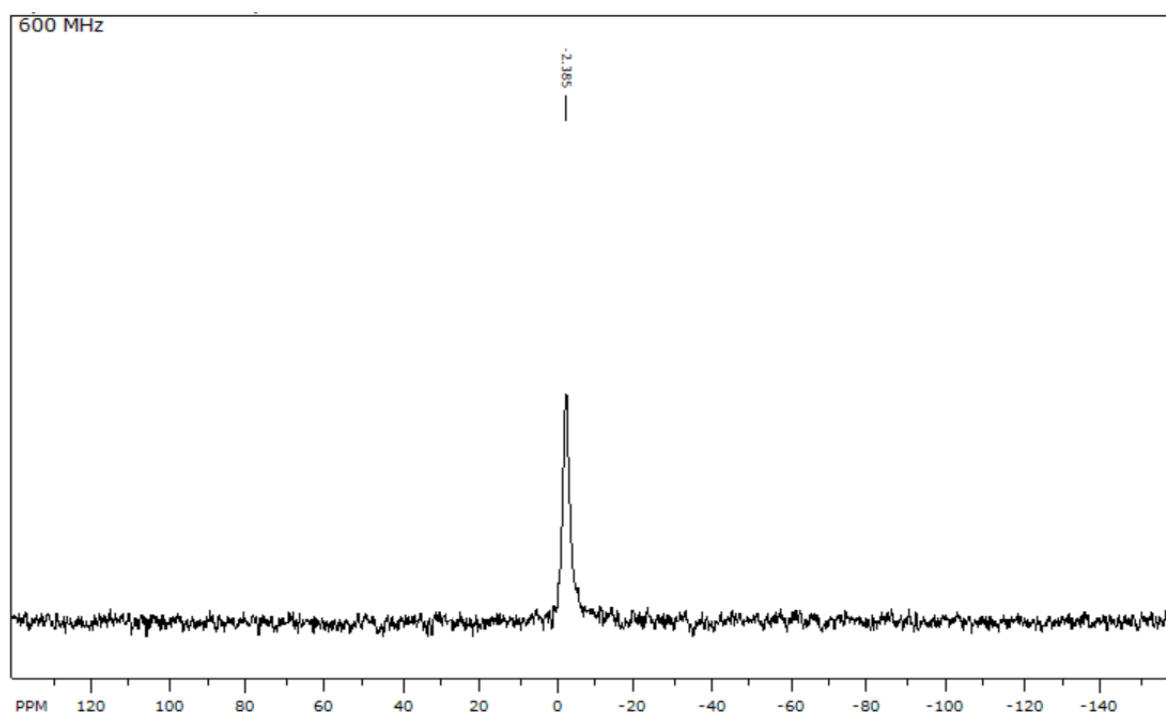

Figure S8.  $^{31}\text{P}$  NMR of complex Cu-5.

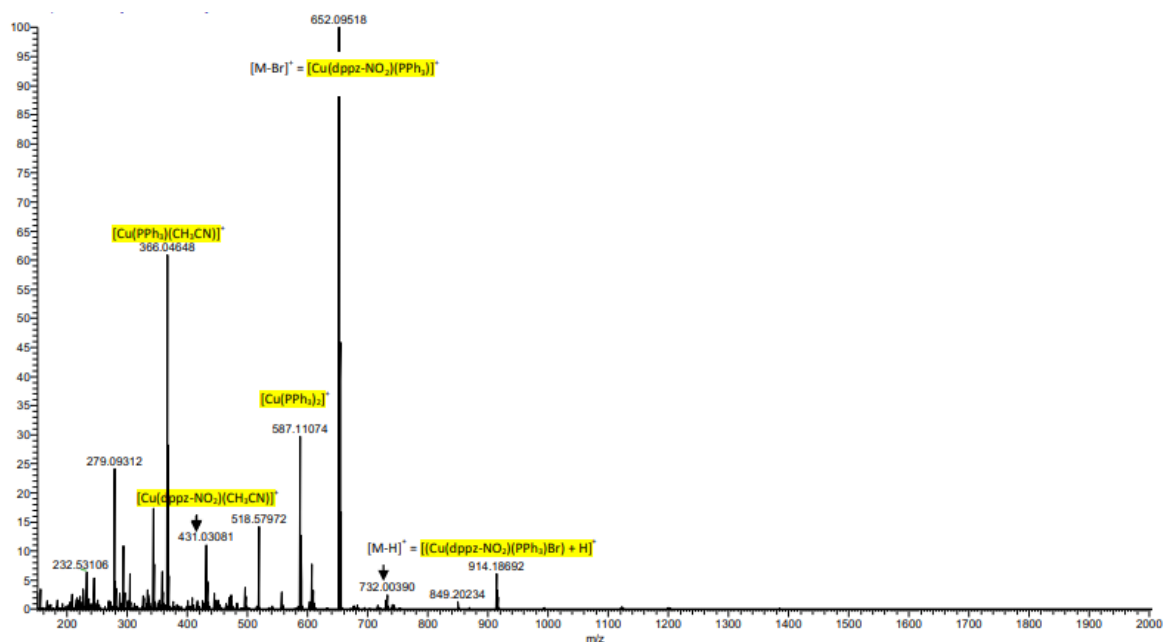

C:\Data\...DIRECT INFUSIONCU2\_1

11/16/2020 9:41:52 AM

CU2

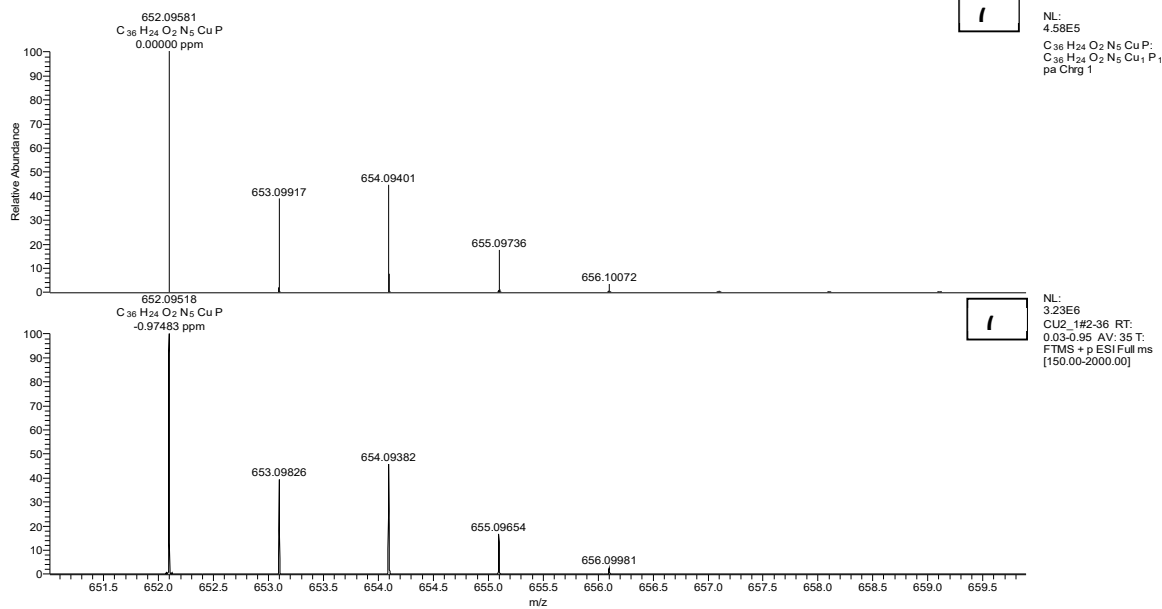

NL:  
4.58E5  
 $C_{38}H_{24}O_2N_5CuP$   
 $C_{38}H_{24}O_2N_5Cu_1P_1$   
pa Creg 1

NL:  
3.23E6  
CU2\_1#2-36 RT:  
0.03-0.95 AV: 35 T:  
FTMS + p ESI/Full ms  
[150.00-2000.00]

Figure S9. Low-resolution and high-resolution mass of complex Cu-2.

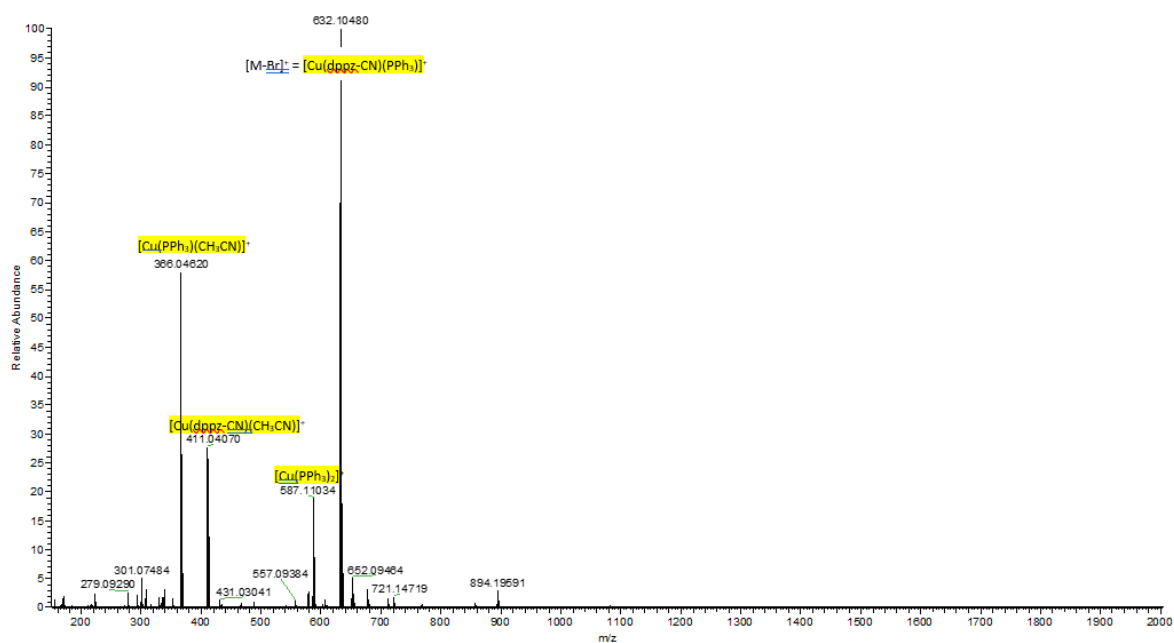

C:\Data\DIRECT INFUSION\CU3\_1

11/16/2020 9:47:17 AM

CU3

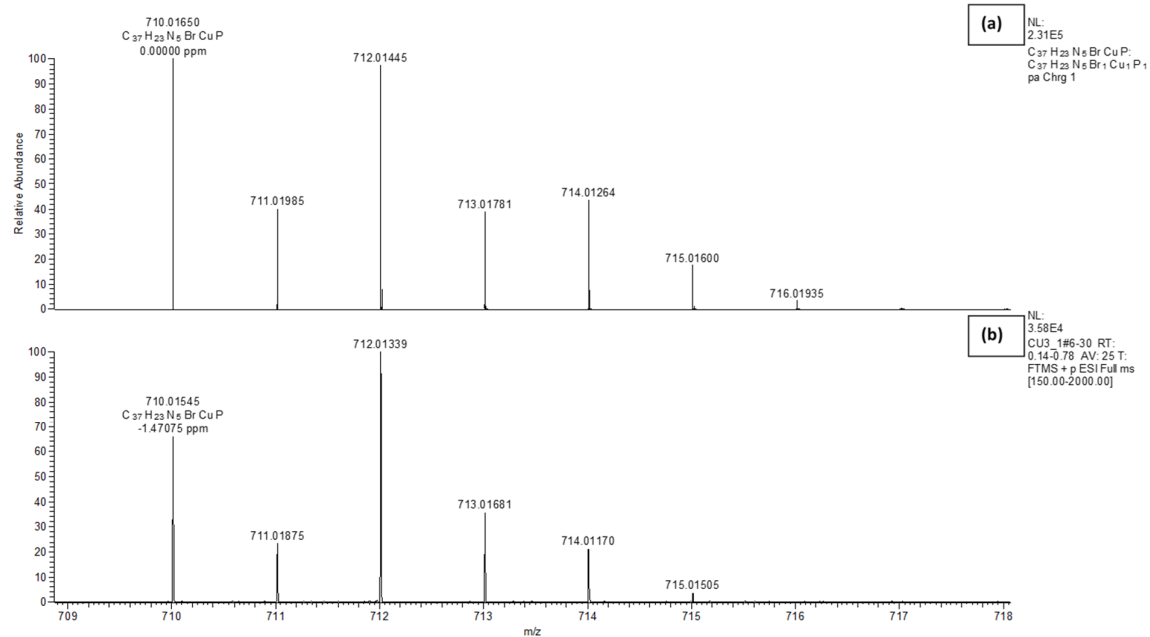

Figure S10. Low-resolution and high-resolution mass of complex Cu-3.

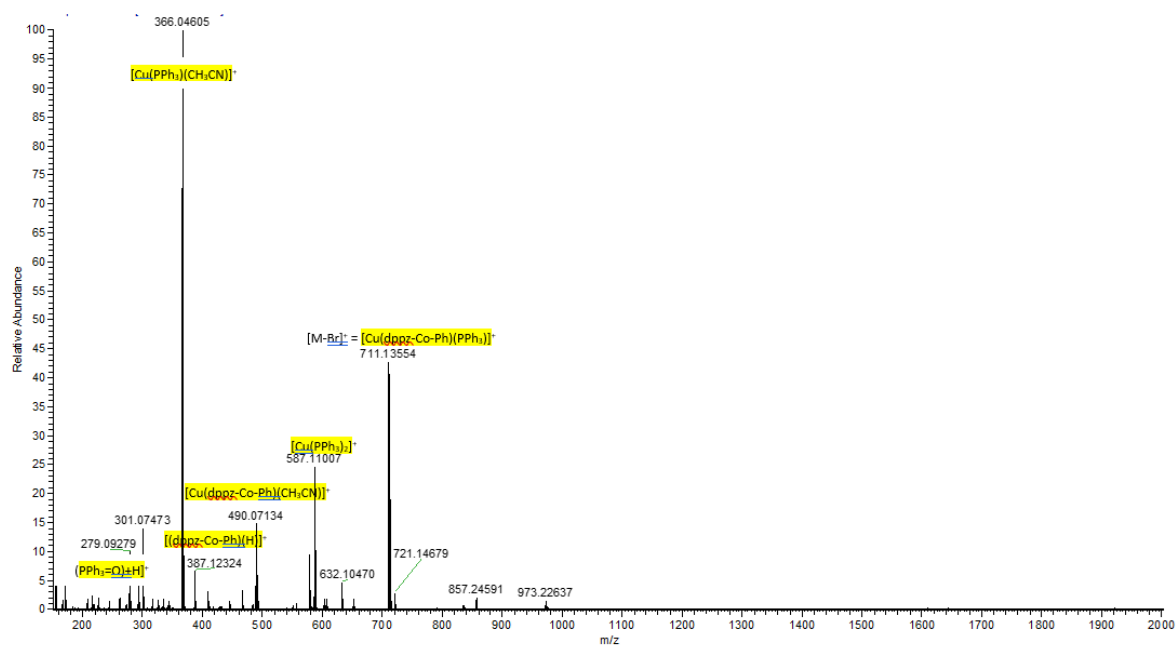

Figure S11. Low-resolution mass of complex Cu-4.



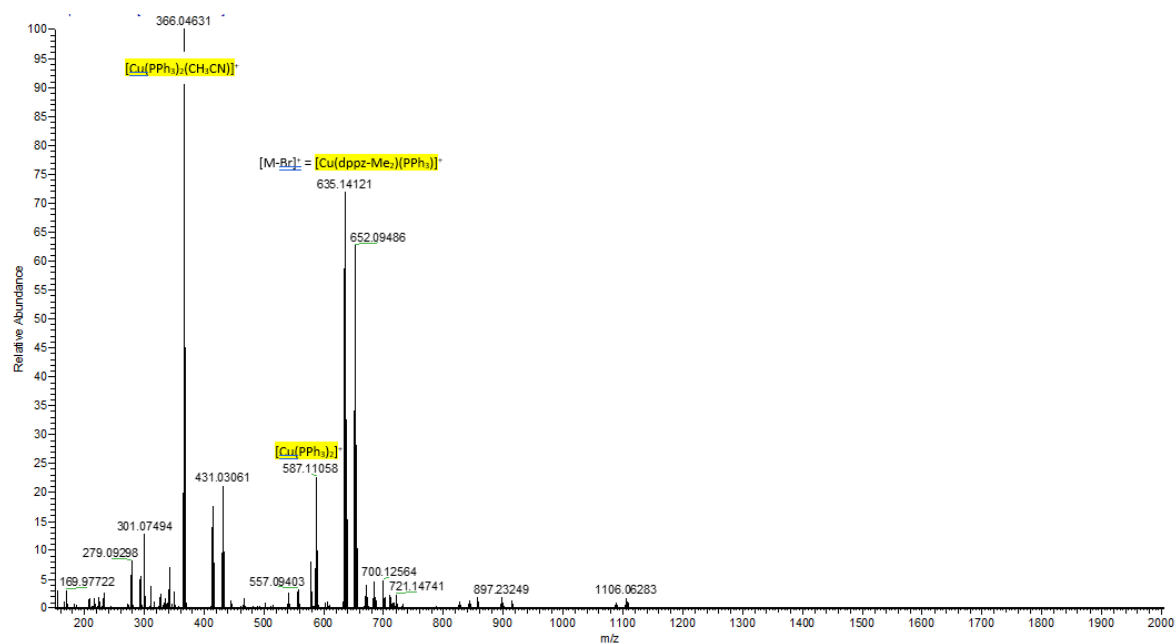

C:\Data\DIRECT INFUSION\CU5\_1

11/16/2020 10:04:47 AM

CU5

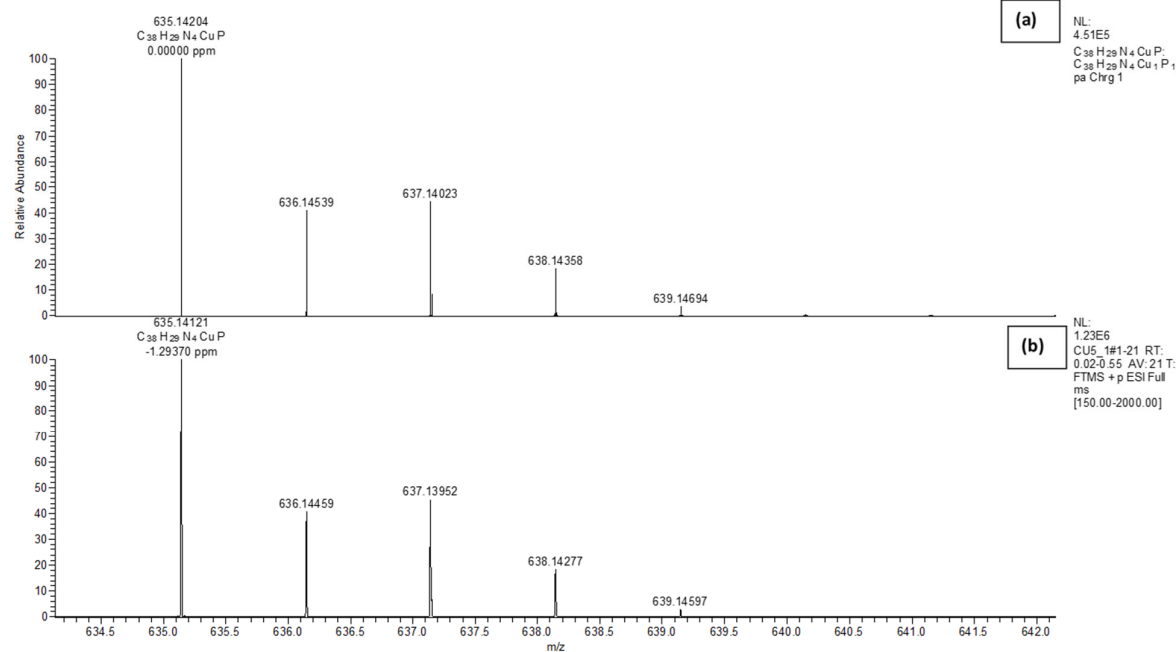

Figure S12. Low-resolution and high-resolution mass of complex Cu-5.

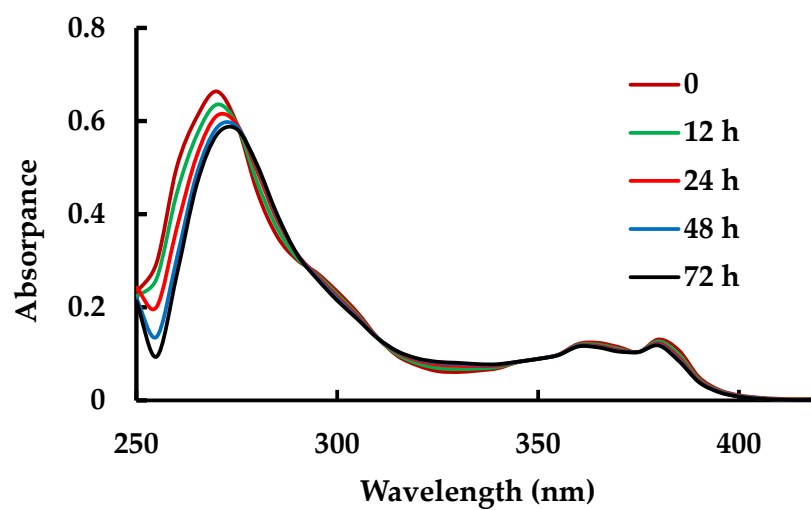

**Figure S13.** Overlaid UV-vis absorption of Cu-1 solution ( $1.3 \times 10^{-5}$  M) in DMSO over several days, showing no sign of degradation.
